# Supplementary material for: Gas-particle partitioning of toluene oxidation products: an experimental and modeling study
Source: Copernicus journal article supplement (doi:10.5194/egusphere-2023-1290), 2023-06-20

# SMPS Data

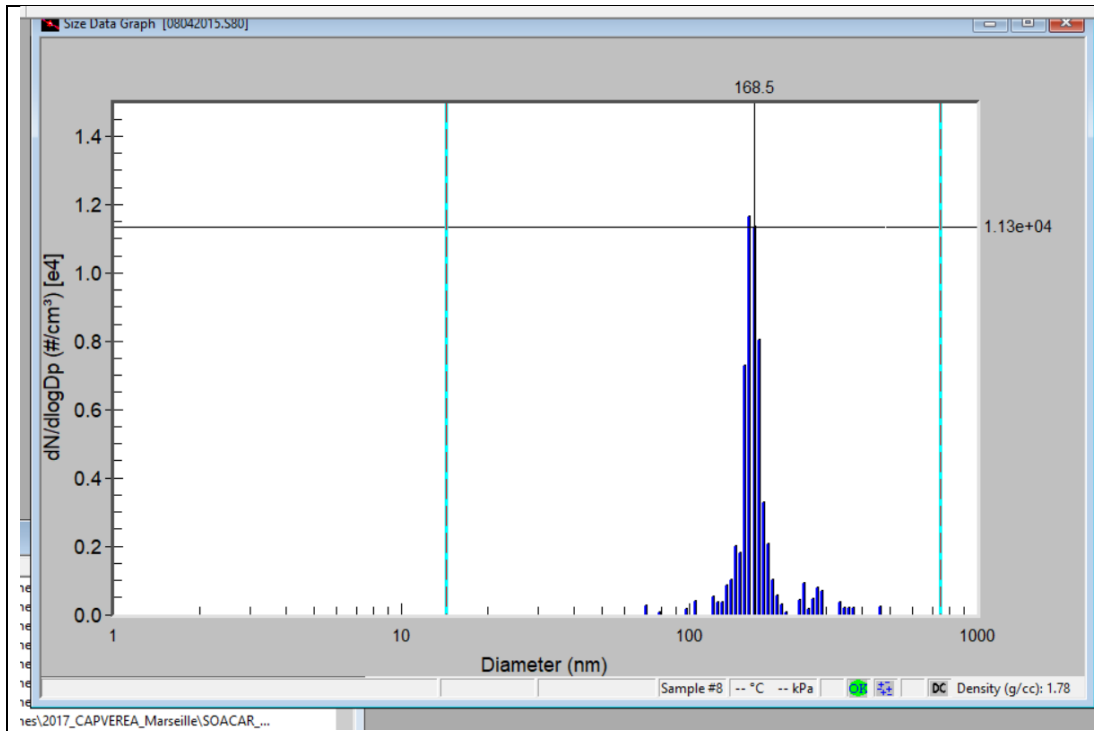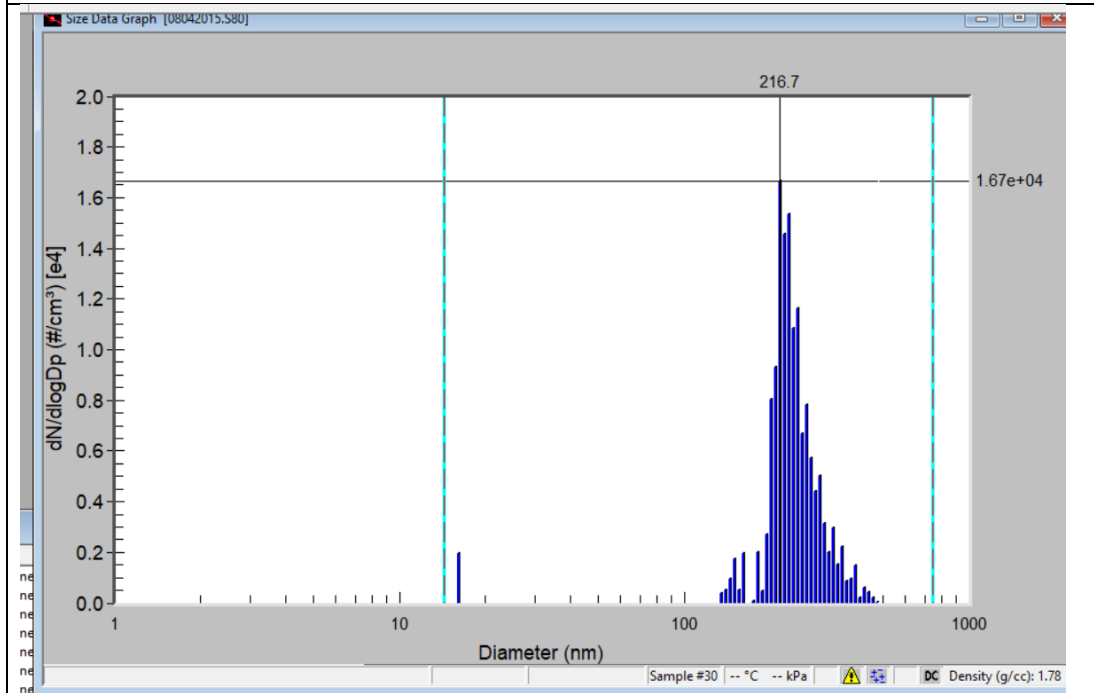

Supplement: Supplementary file [file egusphere-2023-1290-AC2-supplement.pdf]
